# Supplementary material for: Iron (oxyhydr)oxides are responsible for the stabilization of Cu and Zn in AMD after treatment with limestone
Source: PeerJ. 2023 Jan 30;11:e14663. doi: 10.7717/peerj.14663 (PMC9897064; doi:10.7717/peerj.14663)
Supplement: Supplemental Information 3 [file peerj-11-14663-s003.docx]

**Table S2.** Calculation of Qsp of zinc hydroxide in AMD under SS limestone addition

| Time | pOH | Zn(mol L-1) | [Zn2+][OH-]2 | Ksp |
| --- | --- | --- | --- | --- |
| 2h | 8.33 | 5.49*10-5 | 1.20*10-21 | 1.2*10-17 |
| 6h | 7.56 | 6.70*10-6 | 5.08*10-21 |
| 12h | 7.17 | 4.26*10-6 | 1.95*10-20 |
| 24h | 7.03 | 3.28*10-6 | 2.86*10-20 |
| 1d | 6.99 | 1.48*10-6 | 1.55*10-20 |
| 7d | 6.96 | 1.96*10-6 | 2.36*10-20 |
| 14d | 6.87 | 6.58*10-7 | 1.20*10-20 |
| 30d | 6.82 | 3.40*10-7 | 7.79*10-21 |
| 150d | 6.70 | 1.11*10-6 | 4.42*10-20 |
| 300d | 6.54 | 3.31*10-7 | 2.75*10-20 |
