# Supplementary material for: Iron (oxyhydr)oxides are responsible for the stabilization of Cu and Zn in AMD after treatment with limestone
Source: PeerJ. 2023 Jan 30;11:e14663. doi: 10.7717/peerj.14663 (PMC9897064; doi:10.7717/peerj.14663)
Supplement: Supplemental Information 7 [file peerj-11-14663-s007.xlsx]

## Sheet: Sheet1
				time
			limestone dosage	0	2h	4h	6h	8h	12h	1d	7d	14d	30d
			0.4g	2.69	4.09	4.05	4.02	4.02	4	4.05	3.96	4.02	4.14
			0.6g	2.69	4.17	4.25	4.2	4.22	4.24	4.385	4.395	4.53	4.5
			0.7g	2.69	4.51	4.725	4.785	4.955	5.035	5.24	5.11	5.14	5.08
			0.8g	2.69	4.79	5.2	5.49	5.76	5.98	6.29	6.7	6.83	6.82
			1.2g	2.69	5.67	6.12	6.43	6.64	6.82	6.97	7.01	7.12	7.18
